# Supplementary material for: Construction of a MicroRNA-mRNA Network Underlying Decidualized Endometriotic Cyst Stromal Cells Using Bioinformatics Analysis
Source: Biomed Res Int. 2020 Aug 19;2020:9246868. doi: 10.1155/2020/9246868 (PMC7453232; doi:10.1155/2020/9246868)
Supplement: Supplementary Materials — The first table named “miRNA-mRNA pairs” is a supplement to the manuscript. The second table named “GO enrichment analysis” and the third table named “KEGG enrichment analysis” are used. [file 9246868.f1.xls]

## Sheet: miRNA-mRNA pairs
miRNA-mRNA pairs (22 miRNAs-606 mRNAs)
miRNA	Gene	miRDB	miRTarBase	TargetScan	Sum
hsa-miR-155-5p	HIVEP2	1	1	1	3
hsa-miR-4313	ZDHHC8	1	1	1	3
hsa-miR-30d-5p	BNIP3L	1	1	1	3
hsa-miR-18a-5p	CREBL2	1	1	1	3
hsa-miR-181c-5p	NLK	1	1	1	3
hsa-miR-30b-5p	CELSR3	1	1	1	3
hsa-miR-155-5p	MORC3	1	1	1	3
hsa-miR-192-5p	FHDC1	1	1	1	3
hsa-miR-18b-5p	ESR1	1	1	1	3
hsa-miR-7-5p	C1orf21	1	1	1	3
hsa-miR-30d-5p	BAHD1	1	1	1	3
hsa-miR-30d-5p	H6PD	1	1	1	3
hsa-miR-132-3p	MAP3K3	1	1	1	3
hsa-miR-181c-5p	DAZAP2	1	1	1	3
hsa-miR-30d-5p	TBC1D10B	1	1	1	3
hsa-miR-766-3p	MDM2	1	1	1	3
hsa-miR-30b-5p	JOSD1	1	1	1	3
hsa-miR-18b-5p	CRIM1	1	1	1	3
hsa-miR-18b-5p	CREBL2	1	1	1	3
hsa-miR-132-3p	MUC13	1	1	1	3
hsa-miR-30b-5p	EML4	1	1	1	3
hsa-miR-30d-5p	LIN7C	1	1	1	3
hsa-miR-30d-5p	SOCS1	1	1	1	3
hsa-miR-7-5p	ARMC10	1	1	1	3
hsa-miR-194-5p	PTPN12	1	1	1	3
hsa-miR-181c-5p	PPP2R5E	1	1	1	3
hsa-miR-766-3p	MGAT5	1	1	1	3
hsa-miR-155-5p	CD36	1	1	1	3
hsa-miR-155-5p	MITF	1	1	1	3
hsa-miR-30b-5p	PIP4K2A	1	1	1	3
hsa-miR-766-3p	PSMD9	1	1	1	3
hsa-miR-155-5p	FMNL2	1	1	1	3
hsa-miR-18b-5p	ZBTB47	1	1	1	3
hsa-miR-224-3p	QSER1	1	1	1	3
hsa-miR-30d-5p	DHX40	1	1	1	3
hsa-miR-30b-5p	KDM3A	1	1	1	3
hsa-miR-214-5p	YEATS4	1	1	1	3
hsa-miR-132-3p	CC2D1B	1	1	1	3
hsa-miR-192-5p	CTNNBIP1	1	1	1	3
hsa-miR-155-5p	CDC73	1	1	1	3
hsa-miR-30b-5p	PER2	1	1	1	3
hsa-miR-132-3p	HBEGF	1	1	1	3
hsa-miR-7-5p	PPIF	1	1	1	3
hsa-miR-30d-5p	ERLIN1	1	1	1	3
hsa-miR-18a-5p	ESR1	1	1	1	3
hsa-miR-18b-5p	F3	1	1	1	3
hsa-miR-224-3p	NETO2	1	1	1	3
hsa-miR-155-5p	MASTL	1	1	1	3
hsa-miR-30b-5p	CHD1	1	1	1	3
hsa-miR-181c-5p	INO80D	1	1	1	3
hsa-miR-181c-5p	PRKCD	1	1	1	3
hsa-miR-18b-5p	HIF1A	1	1	1	3
hsa-miR-181c-5p	MTX3	1	1	1	3
hsa-miR-181c-5p	SLC19A2	1	1	1	3
hsa-miR-181c-5p	FBXO11	1	1	1	3
hsa-miR-192-5p	CUL3	1	1	1	3
hsa-miR-340-3p	CPM	1	1	1	3
hsa-miR-132-3p	ASF1A	1	1	1	3
hsa-miR-132-3p	FAM199X	1	1	1	3
hsa-miR-30d-5p	RAP1B	1	1	1	3
hsa-miR-7-5p	PIK3CD	1	1	1	3
hsa-miR-30b-5p	DDAH1	1	1	1	3
hsa-miR-7-5p	FNDC4	1	1	1	3
hsa-miR-155-5p	JARID2	1	1	1	3
hsa-miR-30d-5p	MIA3	1	1	1	3
hsa-miR-181c-5p	FKBP1A	1	1	1	3
hsa-miR-192-5p	GRHL1	1	1	1	3
hsa-miR-7-5p	NXT2	1	1	1	3
hsa-miR-30d-5p	CHD1	1	1	1	3
hsa-miR-18a-5p	SAR1A	1	1	1	3
hsa-miR-155-5p	MEIS1	1	1	1	3
hsa-miR-7-5p	GALNT3	1	1	1	3
hsa-miR-30b-5p	NDEL1	1	1	1	3
hsa-miR-30d-5p	USP37	1	1	1	3
hsa-miR-194-5p	SPTY2D1	1	1	1	3
hsa-miR-181c-5p	GIGYF1	1	1	1	3
hsa-miR-155-5p	PKIA	1	1	1	3
hsa-miR-18a-5p	CTGF	1	1	1	3
hsa-miR-7-5p	RAF1	1	1	1	3
hsa-miR-18b-5p	FBXL3	1	1	1	3
hsa-miR-192-5p	DDX50	1	1	1	3
hsa-miR-132-3p	ZNF652	1	1	1	3
hsa-miR-30b-5p	MIB1	1	1	1	3
hsa-miR-7-5p	EXOSC2	1	1	1	3
hsa-miR-192-5p	ITGAV	1	1	1	3
hsa-miR-132-3p	ARHGAP32	1	1	1	3
hsa-miR-30b-5p	PAWR	1	1	1	3
hsa-miR-155-5p	BTBD1	1	1	1	3
hsa-miR-7-5p	FAM126B	1	1	1	3
hsa-miR-7-5p	SLC25A15	1	1	1	3
hsa-miR-18a-5p	NR3C1	1	1	1	3
hsa-miR-155-5p	MYBL1	1	1	1	3
hsa-miR-30d-5p	LIN28B	1	1	1	3
hsa-miR-30b-5p	CDC37L1	1	1	1	3
hsa-miR-7-5p	RBMS3	1	1	1	3
hsa-miR-7-5p	LUC7L2	1	1	1	3
hsa-miR-377-5p	CLEC7A	1	1	1	3
hsa-miR-181c-5p	IL1A	1	1	1	3
hsa-miR-155-5p	S1PR1	1	1	1	3
hsa-miR-192-5p	CCDC121	1	1	1	3
hsa-miR-30d-5p	CBX2	1	1	1	3
hsa-miR-30d-5p	MIB1	1	1	1	3
hsa-miR-30b-5p	SH2B3	1	1	1	3
hsa-miR-155-5p	RAC1	1	1	1	3
hsa-miR-155-5p	NARS	1	1	1	3
hsa-miR-30d-5p	KDM3A	1	1	1	3
hsa-miR-766-3p	TGFBI	1	1	1	3
hsa-miR-181c-5p	IPO5	1	1	1	3
hsa-miR-155-5p	PAXBP1	1	1	1	3
hsa-miR-18a-5p	ATM	1	1	1	3
hsa-miR-30d-5p	PGM3	1	1	1	3
hsa-miR-181c-5p	RAP1B	1	1	1	3
hsa-miR-30b-5p	ZMYND8	1	1	1	3
hsa-miR-18a-5p	PDE4D	1	1	1	3
hsa-miR-155-5p	NAMPT	1	1	1	3
hsa-miR-30b-5p	PTP4A1	1	1	1	3
hsa-miR-30b-5p	MIA3	1	1	1	3
hsa-miR-194-5p	ARID2	1	1	1	3
hsa-miR-192-5p	NCOA3	1	1	1	3
hsa-miR-30b-5p	ADO	1	1	1	3
hsa-miR-18a-5p	GIGYF1	1	1	1	3
hsa-miR-30b-5p	2019-03-06	1	1	1	3
hsa-miR-18b-5p	TBPL1	1	1	1	3
hsa-miR-30d-5p	AVL9	1	1	1	3
hsa-miR-7-5p	KIF16B	1	1	1	3
hsa-miR-155-5p	CCNT2	1	1	1	3
hsa-miR-194-5p	BNIP2	1	1	1	3
hsa-miR-192-5p	ALCAM	1	1	1	3
hsa-miR-18a-5p	RORA	1	1	1	3
hsa-miR-766-3p	TIMM8A	1	1	1	3
hsa-miR-30b-5p	BECN1	1	1	1	3
hsa-miR-132-3p	CALU	1	1	1	3
hsa-miR-766-3p	ZNF468	1	1	1	3
hsa-miR-125a-3p	TAOK1	1	1	1	3
hsa-miR-155-5p	NKX3-1	1	1	1	3
hsa-miR-155-5p	RORA	1	1	1	3
hsa-miR-377-5p	TMEM30B	1	1	1	3
hsa-miR-155-5p	TRAM1	1	1	1	3
hsa-miR-181c-5p	PHOX2B	1	1	1	3
hsa-miR-30d-5p	SLC4A7	1	1	1	3
hsa-miR-4313	ZBTB46	1	1	1	3
hsa-miR-181c-5p	LRRC8D	1	1	1	3
hsa-miR-766-3p	S1PR3	1	1	1	3
hsa-miR-30d-5p	EPB41	1	1	1	3
hsa-miR-30d-5p	JOSD1	1	1	1	3
hsa-miR-18a-5p	F3	1	1	1	3
hsa-miR-18a-5p	MAP7D1	1	1	1	3
hsa-miR-125a-3p	TMEM132B	1	1	1	3
hsa-miR-155-5p	TYRP1	1	1	1	3
hsa-miR-132-3p	SIRT1	1	1	1	3
hsa-miR-192-5p	PKP4	1	1	1	3
hsa-miR-132-3p	GTF2H1	1	1	1	3
hsa-miR-155-5p	TADA2B	1	1	1	3
hsa-miR-7-5p	RNF114	1	1	1	3
hsa-miR-30d-5p	ZBTB39	1	1	1	3
hsa-miR-30b-5p	PPTC7	1	1	1	3
hsa-miR-181c-5p	ZNF780B	1	1	1	3
hsa-miR-377-5p	TFPI	1	1	1	3
hsa-miR-132-3p	BRWD1	1	1	1	3
hsa-miR-30d-5p	IFNAR2	1	1	1	3
hsa-miR-181c-5p	KLF6	1	1	1	3
hsa-miR-30b-5p	RAB22A	1	1	1	3
hsa-miR-378i	RCC2	1	1	1	3
hsa-miR-224-3p	SYNM	1	1	1	3
hsa-miR-18b-5p	RORA	1	1	1	3
hsa-miR-181c-5p	NOTCH2	1	1	1	3
hsa-miR-155-5p	VCPIP1	1	1	1	3
hsa-miR-378a-3p	MAPK1	1	1	1	3
hsa-miR-30b-5p	CCNE2	1	1	1	3
hsa-miR-155-5p	TLE4	1	1	1	3
hsa-miR-132-3p	BMPER	1	1	1	3
hsa-miR-155-5p	MAP3K10	1	1	1	3
hsa-miR-155-5p	ZNF652	1	1	1	3
hsa-miR-155-5p	TRPS1	1	1	1	3
hsa-miR-18a-5p	HIF1A	1	1	1	3
hsa-miR-155-5p	TERF1	1	1	1	3
hsa-miR-125a-3p	MTAP	1	1	1	3
hsa-miR-224-3p	CCSER2	1	1	1	3
hsa-miR-181c-5p	OSBPL3	1	1	1	3
hsa-miR-30b-5p	B3GNT5	1	1	1	3
hsa-miR-30d-5p	FYCO1	1	1	1	3
hsa-miR-766-3p	RAD51	1	1	1	3
hsa-miR-181c-5p	SLC10A7	1	1	1	3
hsa-miR-155-5p	ITK	1	1	1	3
hsa-miR-194-5p	TJAP1	1	1	1	3
hsa-miR-181c-5p	NR6A1	1	1	1	3
hsa-miR-30d-5p	PCGF5	1	1	1	3
hsa-miR-30b-5p	SP4	1	1	1	3
hsa-miR-30d-5p	XPO1	1	1	1	3
hsa-miR-155-5p	SWSAP1	1	1	1	3
hsa-miR-30d-5p	MAST3	1	1	1	3
hsa-miR-181c-5p	CCNK	1	1	1	3
hsa-miR-30b-5p	YOD1	1	1	1	3
hsa-miR-766-3p	UBL4A	1	1	1	3
hsa-miR-30d-5p	TXNDC5	1	1	1	3
hsa-miR-7-5p	PAX6	1	1	1	3
hsa-miR-6069	ZSWIM6	1	1	1	3
hsa-miR-132-3p	CFTR	1	1	1	3
hsa-miR-30d-5p	ZDHHC20	1	1	1	3
hsa-miR-7-5p	CKAP4	1	1	1	3
hsa-miR-30d-5p	DDAH1	1	1	1	3
hsa-miR-30b-5p	KLF10	1	1	1	3
hsa-miR-30d-5p	SIX4	1	1	1	3
hsa-miR-132-3p	VDAC2	1	1	1	3
hsa-miR-18b-5p	TWF1	1	1	1	3
hsa-miR-378a-3p	REST	1	1	1	3
hsa-miR-7-5p	C5orf22	1	1	1	3
hsa-miR-30d-5p	UBN1	1	1	1	3
hsa-miR-30d-5p	SRSF7	1	1	1	3
hsa-miR-766-3p	ENTPD1	1	1	1	3
hsa-miR-30b-5p	PRDM1	1	1	1	3
hsa-miR-181c-5p	PTBP3	1	1	1	3
hsa-miR-7-5p	LRRC59	1	1	1	3
hsa-miR-766-3p	TFDP2	1	1	1	3
hsa-miR-192-5p	KIF5B	1	1	1	3
hsa-miR-30b-5p	CD2AP	1	1	1	3
hsa-miR-7-5p	BCAT1	1	1	1	3
hsa-miR-192-5p	MSN	1	1	1	3
hsa-miR-132-3p	TSPAN6	1	1	1	3
hsa-miR-30d-5p	BECN1	1	1	1	3
hsa-miR-30d-5p	MKRN3	1	1	1	3
hsa-miR-7-5p	PLEC	1	1	1	3
hsa-miR-30b-5p	PICALM	1	1	1	3
hsa-miR-30b-5p	DBF4	1	1	1	3
hsa-miR-30b-5p	IP6K3	1	1	1	3
hsa-miR-766-3p	TFPI	1	1	1	3
hsa-miR-155-5p	ARL6IP5	1	1	1	3
hsa-miR-181c-5p	ZFP36L2	1	1	1	3
hsa-miR-155-5p	TSHZ3	1	1	1	3
hsa-miR-299-3p	PTP4A1	1	1	1	3
hsa-miR-155-5p	ZSWIM6	1	1	1	3
hsa-miR-30d-5p	FBXO45	1	1	1	3
hsa-miR-30d-5p	SH3PXD2A	1	1	1	3
hsa-miR-18a-5p	FAM3C	1	1	1	3
hsa-miR-30b-5p	SERPINE1	1	1	1	3
hsa-miR-30b-5p	POLR3E	1	1	1	3
hsa-miR-7-5p	EIF2S3	1	1	1	3
hsa-miR-192-5p	RIC8B	1	1	1	3
hsa-miR-30b-5p	STX16	1	1	1	3
hsa-miR-30d-5p	KPNA6	1	1	1	3
hsa-miR-194-5p	HBEGF	1	1	1	3
hsa-miR-299-3p	VEGFA	1	1	1	3
hsa-miR-30d-5p	LCLAT1	1	1	1	3
hsa-miR-155-5p	RAPH1	1	1	1	3
hsa-miR-30d-5p	CEP350	1	1	1	3
hsa-miR-30d-5p	LRRC8D	1	1	1	3
hsa-miR-30b-5p	MATR3	1	1	1	3
hsa-miR-7-5p	SDHC	1	1	1	3
hsa-miR-181c-5p	KRBOX4	1	1	1	3
hsa-miR-181c-5p	ZNF266	1	1	1	3
hsa-miR-30d-5p	SETD5	1	1	1	3
hsa-miR-30b-5p	MIER3	1	1	1	3
hsa-miR-30b-5p	PPP1R12A	1	1	1	3
hsa-miR-181c-5p	ATM	1	1	1	3
hsa-miR-30b-5p	FAM91A1	1	1	1	3
hsa-miR-7-5p	TLR4	1	1	1	3
hsa-miR-30b-5p	PNN	1	1	1	3
hsa-miR-132-3p	PHF20L1	1	1	1	3
hsa-miR-7-5p	COLEC12	1	1	1	3
hsa-miR-125a-3p	AREL1	1	1	1	3
hsa-miR-7-5p	IGSF8	1	1	1	3
hsa-miR-125a-3p	PALM2	1	1	1	3
hsa-miR-30d-5p	SETD3	1	1	1	3
hsa-miR-155-5p	TRIP13	1	1	1	3
hsa-miR-18a-5p	TWF1	1	1	1	3
hsa-miR-132-3p	RB1	1	1	1	3
hsa-miR-155-5p	RGL1	1	1	1	3
hsa-miR-7-5p	SERP1	1	1	1	3
hsa-miR-155-5p	RAPGEF2	1	1	1	3
hsa-miR-155-5p	UBXN2B	1	1	1	3
hsa-miR-30b-5p	PGM3	1	1	1	3
hsa-miR-194-5p	KIAA1210	1	1	1	3
hsa-miR-766-3p	LETM1	1	1	1	3
hsa-miR-181c-5p	CBX4	1	1	1	3
hsa-miR-181c-5p	SLC25A37	1	1	1	3
hsa-miR-30b-5p	PPP1R2	1	1	1	3
hsa-miR-30b-5p	MAST3	1	1	1	3
hsa-miR-30d-5p	ANKRA2	1	1	1	3
hsa-miR-30d-5p	MIER3	1	1	1	3
hsa-miR-7-5p	SPATA2	1	1	1	3
hsa-miR-181c-5p	ATP2B1	1	1	1	3
hsa-miR-181c-5p	LPCAT1	1	1	1	3
hsa-miR-18a-5p	VMA21	1	1	1	3
hsa-miR-155-5p	CREBRF	1	1	1	3
hsa-miR-18b-5p	ATM	1	1	1	3
hsa-miR-299-3p	MRPS27	1	1	1	3
hsa-miR-155-5p	SYPL1	1	1	1	3
hsa-miR-224-3p	FEM1C	1	1	1	3
hsa-miR-125a-3p	NARS	1	1	1	3
hsa-miR-30d-5p	MAPK8	1	1	1	3
hsa-miR-30d-5p	TAOK1	1	1	1	3
hsa-miR-135a-3p	RHOBTB3	1	1	1	3
hsa-miR-155-5p	SLC11A2	1	1	1	3
hsa-miR-30b-5p	HIC2	1	1	1	3
hsa-miR-30b-5p	EPB41	1	1	1	3
hsa-miR-30b-5p	DCTN4	1	1	1	3
hsa-miR-30d-5p	PICALM	1	1	1	3
hsa-miR-125a-3p	FYN	1	1	1	3
hsa-miR-155-5p	SMAD2	1	1	1	3
hsa-miR-181c-5p	HEPHL1	1	1	1	3
hsa-miR-7-5p	RRAS2	1	1	1	3
hsa-miR-155-5p	TOMM20	1	1	1	3
hsa-miR-18a-5p	LIN54	1	1	1	3
hsa-miR-766-3p	PDCL3	1	1	1	3
hsa-miR-155-5p	LCORL	1	1	1	3
hsa-miR-30b-5p	PHTF2	1	1	1	3
hsa-miR-30b-5p	LCLAT1	1	1	1	3
hsa-miR-155-5p	AIMP1	1	1	1	3
hsa-miR-30b-5p	GALNT1	1	1	1	3
hsa-miR-30b-5p	KLHL28	1	1	1	3
hsa-miR-30b-5p	TAOK1	1	1	1	3
hsa-miR-30b-5p	USP37	1	1	1	3
hsa-miR-155-5p	PKN2	1	1	1	3
hsa-miR-155-5p	ZNF492	1	1	1	3
hsa-miR-30b-5p	CBX2	1	1	1	3
hsa-miR-192-5p	ARFGEF1	1	1	1	3
hsa-miR-377-5p	FAM198B	1	1	1	3
hsa-miR-30b-5p	GNAI2	1	1	1	3
hsa-miR-766-3p	LRTOMT	1	1	1	3
hsa-miR-125a-3p	TIRAP	1	1	1	3
hsa-miR-155-5p	BACH1	1	1	1	3
hsa-miR-132-3p	AMD1	1	1	1	3
hsa-miR-194-5p	SOCS2	1	1	1	3
hsa-miR-30b-5p	RUNX2	1	1	1	3
hsa-miR-18b-5p	PDE4D	1	1	1	3
hsa-miR-18a-5p	HSF2	1	1	1	3
hsa-miR-132-3p	BNIP2	1	1	1	3
hsa-miR-181c-5p	FAM3C	1	1	1	3
hsa-miR-30b-5p	SEC24A	1	1	1	3
hsa-miR-7-5p	TPP1	1	1	1	3
hsa-miR-125a-3p	NUFIP2	1	1	1	3
hsa-miR-30d-5p	CDC37L1	1	1	1	3
hsa-miR-30b-5p	ATP2A2	1	1	1	3
hsa-miR-30d-5p	GNAI2	1	1	1	3
hsa-miR-30d-5p	RAB10	1	1	1	3
hsa-miR-155-5p	CHAF1A	1	1	1	3
hsa-miR-181c-5p	SIRT1	1	1	1	3
hsa-miR-30b-5p	GOLGA1	1	1	1	3
hsa-miR-7-5p	ASXL1	1	1	1	3
hsa-miR-192-5p	TMTC3	1	1	1	3
hsa-miR-30b-5p	SLC4A7	1	1	1	3
hsa-miR-181c-5p	DDIT4	1	1	1	3
hsa-miR-30b-5p	TWF1	1	1	1	3
hsa-miR-18a-5p	FBXL3	1	1	1	3
hsa-miR-30b-5p	SRSF7	1	1	1	3
hsa-miR-181c-5p	RPS6KA3	1	1	1	3
hsa-miR-181c-5p	G3BP2	1	1	1	3
hsa-miR-155-5p	FAR1	1	1	1	3
hsa-miR-766-3p	FAM126B	1	1	1	3
hsa-miR-30d-5p	RUNX2	1	1	1	3
hsa-miR-30b-5p	STRIP1	1	1	1	3
hsa-miR-7-5p	CACNG7	1	1	1	3
hsa-miR-30d-5p	TWF1	1	1	1	3
hsa-miR-30d-5p	MYBL2	1	1	1	3
hsa-miR-181c-5p	CAPRIN2	1	1	1	3
hsa-miR-30b-5p	FOXG1	1	1	1	3
hsa-miR-132-3p	FBXO28	1	1	1	3
hsa-miR-181c-5p	LCLAT1	1	1	1	3
hsa-miR-155-5p	LRIF1	1	1	1	3
hsa-miR-192-5p	DYRK1A	1	1	1	3
hsa-miR-155-5p	ZNF431	1	1	1	3
hsa-miR-30d-5p	AKIRIN1	1	1	1	3
hsa-miR-30d-5p	PRDM1	1	1	1	3
hsa-miR-18b-5p	RAB5C	1	1	1	3
hsa-miR-30d-5p	GALNT1	1	1	1	3
hsa-miR-155-5p	SDCBP	1	1	1	3
hsa-miR-30b-5p	UBN1	1	1	1	3
hsa-miR-7-5p	IDE	1	1	1	3
hsa-miR-194-5p	CAPZA1	1	1	1	3
hsa-miR-155-5p	EGFR	1	1	1	3
hsa-miR-125a-3p	NUP153	1	1	1	3
hsa-miR-30d-5p	IP6K3	1	1	1	3
hsa-miR-378a-3p	RCC2	1	1	1	3
hsa-miR-181c-5p	DYNC1LI2	1	1	1	3
hsa-miR-30d-5p	DBF4	1	1	1	3
hsa-miR-30b-5p	SOCS3	1	1	1	3
hsa-miR-155-5p	GPM6B	1	1	1	3
hsa-miR-194-5p	CHAC1	1	1	1	3
hsa-miR-30b-5p	SETD3	1	1	1	3
hsa-miR-132-3p	PTGS2	1	1	1	3
hsa-miR-30b-5p	ANKRA2	1	1	1	3
hsa-miR-766-3p	EMC1	1	1	1	3
hsa-miR-192-5p	LIMS1	1	1	1	3
hsa-miR-7-5p	NR1H2	1	1	1	3
hsa-miR-766-3p	ACACB	1	1	1	3
hsa-miR-155-5p	RNF123	1	1	1	3
hsa-miR-194-5p	TLN2	1	1	1	3
hsa-miR-155-5p	RAB11FIP2	1	1	1	3
hsa-miR-155-5p	ANKFY1	1	1	1	3
hsa-miR-155-5p	ZBTB38	1	1	1	3
hsa-miR-194-5p	TMED5	1	1	1	3
hsa-miR-377-5p	ZNF385A	1	1	1	3
hsa-miR-30d-5p	ZMYND8	1	1	1	3
hsa-miR-30d-5p	CBX3	1	1	1	3
hsa-miR-155-5p	CBL	1	1	1	3
hsa-miR-30b-5p	RAB10	1	1	1	3
hsa-miR-155-5p	SMARCA4	1	1	1	3
hsa-miR-30d-5p	NAPG	1	1	1	3
hsa-miR-30d-5p	TNRC6A	1	1	1	3
hsa-miR-30d-5p	PLEKHO2	1	1	1	3
hsa-miR-30b-5p	MYBL2	1	1	1	3
hsa-miR-30b-5p	FAM104A	1	1	1	3
hsa-miR-7-5p	HMGN4	1	1	1	3
hsa-miR-377-5p	CNNM4	1	1	1	3
hsa-miR-7-5p	IRS2	1	1	1	3
hsa-miR-155-5p	IL17RB	1	1	1	3
hsa-miR-30d-5p	JDP2	1	1	1	3
hsa-miR-224-3p	ZNF275	1	1	1	3
hsa-miR-7-5p	HOXB5	1	1	1	3
hsa-miR-7-5p	SMARCD1	1	1	1	3
hsa-miR-7-5p	CAPZA1	1	1	1	3
hsa-miR-132-3p	ACTR2	1	1	1	3
hsa-miR-7-5p	ERI2	1	1	1	3
hsa-miR-30d-5p	MTDH	1	1	1	3
hsa-miR-155-5p	CEBPB	1	1	1	3
hsa-miR-155-5p	ETS1	1	1	1	3
hsa-miR-7-5p	TMEM43	1	1	1	3
hsa-miR-4313	MECP2	1	1	1	3
hsa-miR-30d-5p	PCDH10	1	1	1	3
hsa-miR-155-5p	STRN3	1	1	1	3
hsa-miR-299-3p	ZNF207	1	1	1	3
hsa-miR-155-5p	GABARAPL1	1	1	1	3
hsa-miR-30b-5p	PCGF5	1	1	1	3
hsa-miR-18a-5p	TBPL1	1	1	1	3
hsa-miR-30d-5p	FAM91A1	1	1	1	3
hsa-miR-155-5p	TRIM32	1	1	1	3
hsa-miR-7-5p	ZNF365	1	1	1	3
hsa-miR-181c-5p	ELMSAN1	1	1	1	3
hsa-miR-30d-5p	PAWR	1	1	1	3
hsa-miR-132-3p	PRDM15	1	1	1	3
hsa-miR-155-5p	ZIC3	1	1	1	3
hsa-miR-181c-5p	HECW2	1	1	1	3
hsa-miR-7-5p	CNOT8	1	1	1	3
hsa-miR-181c-5p	ZBTB4	1	1	1	3
hsa-miR-30b-5p	SIX4	1	1	1	3
hsa-miR-181c-5p	BTBD3	1	1	1	3
hsa-miR-30b-5p	VPS33A	1	1	1	3
hsa-miR-18a-5p	ZNF367	1	1	1	3
hsa-miR-7-5p	SLC6A9	1	1	1	3
hsa-miR-192-5p	ANAPC10	1	1	1	3
hsa-miR-181c-5p	KDM5A	1	1	1	3
hsa-miR-181c-5p	PDIA6	1	1	1	3
hsa-miR-155-5p	DPY19L1	1	1	1	3
hsa-miR-155-5p	RREB1	1	1	1	3
hsa-miR-155-5p	FAM135A	1	1	1	3
hsa-miR-7-5p	MIF4GD	1	1	1	3
hsa-miR-7-5p	CCNT2	1	1	1	3
hsa-miR-30b-5p	LRRC8D	1	1	1	3
hsa-miR-30d-5p	2019-03-06	1	1	1	3
hsa-miR-192-5p	TCF7	1	1	1	3
hsa-miR-7-5p	CRLS1	1	1	1	3
hsa-miR-155-5p	ADD3	1	1	1	3
hsa-miR-18a-5p	NEDD9	1	1	1	3
hsa-miR-7-5p	UBXN2B	1	1	1	3
hsa-miR-30d-5p	UBE3C	1	1	1	3
hsa-miR-181c-5p	FSD1L	1	1	1	3
hsa-miR-181c-5p	ETS1	1	1	1	3
hsa-miR-18b-5p	TAOK1	1	1	1	3
hsa-miR-125a-3p	SYNJ2BP	1	1	1	3
hsa-miR-155-5p	WBP1L	1	1	1	3
hsa-miR-181c-5p	ZFP36L1	1	1	1	3
hsa-miR-132-3p	PSMD12	1	1	1	3
hsa-miR-18b-5p	CTGF	1	1	1	3
hsa-miR-7-5p	PSME3	1	1	1	3
hsa-miR-30d-5p	SP4	1	1	1	3
hsa-miR-18b-5p	FAM3C	1	1	1	3
hsa-miR-192-5p	PABPC4	1	1	1	3
hsa-miR-155-5p	FOS	1	1	1	3
hsa-miR-181c-5p	KPNA1	1	1	1	3
hsa-miR-7-5p	CALU	1	1	1	3
hsa-miR-192-5p	RPAP2	1	1	1	3
hsa-miR-377-5p	SCN3B	1	1	1	3
hsa-miR-30d-5p	CD2AP	1	1	1	3
hsa-miR-7-5p	DNAJC5	1	1	1	3
hsa-miR-7-5p	VPS26A	1	1	1	3
hsa-miR-30d-5p	JAK1	1	1	1	3
hsa-miR-224-3p	ELAVL1	1	1	1	3
hsa-miR-125a-3p	SKI	1	1	1	3
hsa-miR-766-3p	IRGQ	1	1	1	3
hsa-miR-30b-5p	ZDHHC17	1	1	1	3
hsa-miR-155-5p	WWC1	1	1	1	3
hsa-miR-30b-5p	FYCO1	1	1	1	3
hsa-miR-30b-5p	RAP1B	1	1	1	3
hsa-miR-30d-5p	ADO	1	1	1	3
hsa-miR-30d-5p	DCTN4	1	1	1	3
hsa-miR-30b-5p	SLC38A7	1	1	1	3
hsa-miR-132-3p	TJAP1	1	1	1	3
hsa-miR-181c-5p	SSX2IP	1	1	1	3
hsa-miR-766-3p	FUS	1	1	1	3
hsa-miR-30b-5p	GCLC	1	1	1	3
hsa-miR-30b-5p	SYPL1	1	1	1	3
hsa-miR-30d-5p	PER2	1	1	1	3
hsa-miR-155-5p	C3orf18	1	1	1	3
hsa-miR-7-5p	IRS1	1	1	1	3
hsa-miR-30b-5p	JDP2	1	1	1	3
hsa-miR-7-5p	NDFIP2	1	1	1	3
hsa-miR-378a-3p	IGF1R	1	1	1	3
hsa-miR-192-5p	ZDHHC2	1	1	1	3
hsa-miR-7-5p	SDE2	1	1	1	3
hsa-miR-30b-5p	PCDH10	1	1	1	3
hsa-miR-7-5p	CRTAP	1	1	1	3
hsa-miR-224-3p	JMY	1	1	1	3
hsa-miR-181c-5p	CPOX	1	1	1	3
hsa-miR-181c-5p	ATXN7	1	1	1	3
hsa-miR-30b-5p	KPNA6	1	1	1	3
hsa-miR-192-5p	ZMAT3	1	1	1	3
hsa-miR-6069	TSPYL1	1	1	1	3
hsa-miR-30d-5p	KLF10	1	1	1	3
hsa-miR-181c-5p	RBM25	1	1	1	3
hsa-miR-7-5p	SNAP29	1	1	1	3
hsa-miR-7-5p	GJC1	1	1	1	3
hsa-miR-132-3p	ARID2	1	1	1	3
hsa-miR-7-5p	UBQLN4	1	1	1	3
hsa-miR-155-5p	PCDH9	1	1	1	3
hsa-miR-18a-5p	CTDSPL	1	1	1	3
hsa-miR-30b-5p	ERLIN1	1	1	1	3
hsa-miR-155-5p	PALD1	1	1	1	3
hsa-miR-7-5p	KLF4	1	1	1	3
hsa-miR-155-5p	KBTBD2	1	1	1	3
hsa-miR-7-5p	EIF5A2	1	1	1	3
hsa-miR-155-5p	KRAS	1	1	1	3
hsa-miR-155-5p	HBP1	1	1	1	3
hsa-miR-18a-5p	CRIM1	1	1	1	3
hsa-miR-155-5p	PDLIM5	1	1	1	3
hsa-miR-30d-5p	SLC38A7	1	1	1	3
hsa-miR-18a-5p	STK4	1	1	1	3
hsa-miR-377-5p	TAB2	1	1	1	3
hsa-miR-30b-5p	S100PBP	1	1	1	3
hsa-miR-30b-5p	CEP350	1	1	1	3
hsa-miR-132-3p	CASP7	1	1	1	3
hsa-miR-30d-5p	HIC2	1	1	1	3
hsa-miR-30b-5p	SOCS1	1	1	1	3
hsa-miR-7-5p	ZNF275	1	1	1	3
hsa-miR-7-5p	TMEM69	1	1	1	3
hsa-miR-30d-5p	VPS33A	1	1	1	3
hsa-miR-7-5p	SNCA	1	1	1	3
hsa-miR-18b-5p	IRF2	1	1	1	3
hsa-miR-192-5p	DICER1	1	1	1	3
hsa-miR-135a-3p	QSER1	1	1	1	3
hsa-miR-18a-5p	IGF2BP2	1	1	1	3
hsa-miR-7-5p	RELA	1	1	1	3
hsa-miR-30b-5p	CBX3	1	1	1	3
hsa-miR-30d-5p	RAD23B	1	1	1	3
hsa-miR-155-5p	TAPT1	1	1	1	3
hsa-miR-30b-5p	LIN7C	1	1	1	3
hsa-miR-30b-5p	AKIRIN1	1	1	1	3
hsa-miR-30d-5p	TFDP1	1	1	1	3
hsa-miR-181c-5p	GATA6	1	1	1	3
hsa-miR-181c-5p	TNPO1	1	1	1	3
hsa-miR-30d-5p	PSMD7	1	1	1	3
hsa-miR-125a-3p	ZNF333	1	1	1	3
hsa-miR-18b-5p	ZNF367	1	1	1	3
hsa-miR-30d-5p	PPP1R2	1	1	1	3
hsa-miR-30b-5p	PSMD7	1	1	1	3
hsa-miR-30d-5p	FAM104A	1	1	1	3
hsa-miR-155-5p	FAM91A1	1	1	1	3
hsa-miR-18b-5p	LIN54	1	1	1	3
hsa-miR-30b-5p	GLCE	1	1	1	3
hsa-miR-766-3p	RER1	1	1	1	3
hsa-miR-155-5p	WEE1	1	1	1	3
hsa-miR-30d-5p	LMBR1L	1	1	1	3
hsa-miR-18b-5p	TMEM2	1	1	1	3
hsa-miR-30b-5p	XPO1	1	1	1	3
hsa-miR-7-5p	SPTSSB	1	1	1	3
hsa-miR-181c-5p	FAM160A2	1	1	1	3
hsa-miR-155-5p	TWF1	1	1	1	3
hsa-miR-30b-5p	BAHD1	1	1	1	3
hsa-miR-155-5p	TAF5L	1	1	1	3
hsa-miR-30d-5p	EML4	1	1	1	3
hsa-miR-30b-5p	FBXO45	1	1	1	3
hsa-miR-30b-5p	NRBP1	1	1	1	3
hsa-miR-378a-3p	GRB2	1	1	1	3
hsa-miR-192-5p	ZBTB34	1	1	1	3
hsa-miR-30b-5p	NAPG	1	1	1	3
hsa-miR-181c-5p	DPYSL2	1	1	1	3
hsa-miR-30d-5p	S100PBP	1	1	1	3
hsa-miR-30d-5p	PHTF2	1	1	1	3
hsa-miR-18a-5p	IRF2	1	1	1	3
hsa-miR-18b-5p	GIGYF1	1	1	1	3
hsa-miR-7-5p	CNN3	1	1	1	3
hsa-miR-7-5p	NREP	1	1	1	3
hsa-miR-30d-5p	GCLC	1	1	1	3
hsa-miR-181c-5p	ARRDC3	1	1	1	3
hsa-miR-30b-5p	ZDHHC20	1	1	1	3
hsa-miR-132-3p	SOX5	1	1	1	3
hsa-miR-30d-5p	NDEL1	1	1	1	3
hsa-miR-181c-5p	GSKIP	1	1	1	3
hsa-miR-132-3p	RASA1	1	1	1	3
hsa-miR-181c-5p	MPP5	1	1	1	3
hsa-miR-30d-5p	STRIP1	1	1	1	3
hsa-miR-155-5p	LRRC59	1	1	1	3
hsa-miR-30d-5p	EED	1	1	1	3
hsa-miR-7-5p	TRMT13	1	1	1	3
hsa-miR-30b-5p	RFX7	1	1	1	3
hsa-miR-18a-5p	XYLT2	1	1	1	3
hsa-miR-181c-5p	ZFAND6	1	1	1	3
hsa-miR-30d-5p	PPARGC1B	1	1	1	3
hsa-miR-30b-5p	OTUD4	1	1	1	3
hsa-miR-30b-5p	IFNAR2	1	1	1	3
hsa-miR-7-5p	RAB11FIP5	1	1	1	3
hsa-miR-30d-5p	GOLGA1	1	1	1	3
hsa-miR-30b-5p	TFDP1	1	1	1	3
hsa-miR-30b-5p	DHX40	1	1	1	3
hsa-miR-155-5p	MPP5	1	1	1	3
hsa-miR-192-5p	RB1	1	1	1	3
hsa-miR-155-5p	NOVA1	1	1	1	3
hsa-miR-766-3p	ITPRIPL2	1	1	1	3
hsa-miR-18b-5p	PARD6B	1	1	1	3
hsa-miR-155-5p	CSF1R	1	1	1	3
hsa-miR-125a-3p	FXR1	1	1	1	3
hsa-miR-181c-5p	KMT2E	1	1	1	3
hsa-miR-181c-5p	ZNF699	1	1	1	3
hsa-miR-125a-3p	SAR1B	1	1	1	3
hsa-miR-181c-5p	KIF3B	1	1	1	3
hsa-miR-766-3p	S1PR2	1	1	1	3
hsa-miR-155-5p	RCN2	1	1	1	3
hsa-miR-30b-5p	EED	1	1	1	3
hsa-miR-192-5p	TMED10	1	1	1	3
hsa-miR-30b-5p	PPARGC1B	1	1	1	3
hsa-miR-132-3p	CCDC169	1	1	1	3
hsa-miR-7-5p	ZNF106	1	1	1	3
hsa-miR-155-5p	ZNF260	1	1	1	3
hsa-miR-155-5p	CAB39	1	1	1	3
hsa-miR-7-5p	COMMD7	1	1	1	3
hsa-miR-30b-5p	MKRN3	1	1	1	3
hsa-miR-192-5p	PRKD3	1	1	1	3
hsa-miR-18a-5p	CDK19	1	1	1	3
hsa-miR-30b-5p	RAD23B	1	1	1	3
hsa-miR-181c-5p	TBL1XR1	1	1	1	3
hsa-miR-181c-5p	ZNF268	1	1	1	3
hsa-miR-30d-5p	TAF4B	1	1	1	3
hsa-miR-30d-5p	SEC24A	1	1	1	3
hsa-miR-155-5p	RAB5C	1	1	1	3
hsa-miR-30b-5p	NFAT5	1	1	1	3
hsa-miR-30d-5p	PTP4A1	1	1	1	3
hsa-miR-18a-5p	UBTD2	1	1	1	3
hsa-miR-181c-5p	KIAA1551	1	1	1	3
hsa-miR-18b-5p	VMA21	1	1	1	3
hsa-miR-181c-5p	PRRC2C	1	1	1	3
hsa-miR-214-5p	GGA3	1	1	1	3
hsa-miR-155-5p	SPI1	1	1	1	3
hsa-miR-7-5p	RPL15	1	1	1	3
hsa-miR-155-5p	IKBIP	1	1	1	3
hsa-miR-377-5p	PLCXD1	1	1	1	3
hsa-miR-30b-5p	LIN28B	1	1	1	3
hsa-miR-132-3p	MTMR10	1	1	1	3
hsa-miR-192-5p	SEMA4D	1	1	1	3
hsa-miR-181c-5p	PAPD5	1	1	1	3
hsa-miR-7-5p	LYPD3	1	1	1	3
hsa-miR-7-5p	CHAMP1	1	1	1	3
hsa-miR-30b-5p	TBC1D10B	1	1	1	3
hsa-miR-181c-5p	GOLGA1	1	1	1	3
hsa-miR-192-5p	WNK1	1	1	1	3
hsa-miR-30d-5p	ATP2A2	1	1	1	3
hsa-miR-30b-5p	AVL9	1	1	1	3
hsa-miR-192-5p	L2HGDH	1	1	1	3
hsa-miR-30b-5p	LHFPL2	1	1	1	3
hsa-miR-194-5p	EPC2	1	1	1	3
hsa-miR-340-3p	SYNJ2BP	1	1	1	3
hsa-miR-7-5p	ZC3H4	1	1	1	3
hsa-miR-30b-5p	JAK1	1	1	1	3
hsa-miR-30d-5p	AFF4	1	1	1	3
hsa-miR-377-5p	HAVCR1	1	1	1	3
hsa-miR-30d-5p	ZNRF1	1	1	1	3
hsa-miR-7-5p	ALG9	1	1	1	3
hsa-miR-155-5p	ARID2	1	1	1	3
hsa-miR-192-5p	TMPO	1	1	1	3
hsa-miR-7-5p	PRDM6	1	1	1	3
hsa-miR-6069	CRY2	1	1	1	3
hsa-miR-30b-5p	MTDH	1	1	1	3
hsa-miR-30b-5p	TXNDC5	1	1	1	3
hsa-miR-181c-5p	CARM1	1	1	1	3
hsa-miR-132-3p	OSBPL8	1	1	1	3
hsa-miR-30b-5p	SH3PXD2A	1	1	1	3
hsa-miR-30b-5p	TNRC6A	1	1	1	3
hsa-miR-181c-5p	SLC38A2	1	1	1	3
hsa-miR-30b-5p	ZBTB39	1	1	1	3
hsa-miR-155-5p	TP53INP1	1	1	1	3
hsa-miR-30b-5p	BDP1	1	1	1	3
hsa-miR-30b-5p	UBE3C	1	1	1	3
hsa-miR-18b-5p	SAR1A	1	1	1	3
hsa-miR-155-5p	CSNK1G2	1	1	1	3
hsa-miR-155-5p	SP1	1	1	1	3
hsa-miR-155-5p	ARL5B	1	1	1	3
hsa-miR-18a-5p	RAB5C	1	1	1	3
hsa-miR-155-5p	DHX40	1	1	1	3
hsa-miR-125a-3p	MTFR1	1	1	1	3
hsa-miR-155-5p	VEZF1	1	1	1	3
hsa-miR-7-5p	CNNM4	1	1	1	3
hsa-miR-30d-5p	PPP1R12A	1	1	1	3
hsa-miR-7-5p	OSBPL11	1	1	1	3
hsa-miR-18a-5p	ZBTB47	1	1	1	3
hsa-miR-181c-5p	ZNF781	1	1	1	3
hsa-miR-192-5p	ARL2BP	1	1	1	3
hsa-miR-155-5p	ERMP1	1	1	1	3
hsa-miR-30b-5p	SETD5	1	1	1	3
hsa-miR-7-5p	RYK	1	1	1	3
hsa-miR-30d-5p	FOXG1	1	1	1	3
hsa-miR-30d-5p	PPTC7	1	1	1	3
hsa-miR-30d-5p	STX16	1	1	1	3
hsa-miR-378i	REST	1	1	1	3
hsa-miR-7-5p	SPTY2D1	1	1	1	3
hsa-miR-192-5p	USP45	1	1	1	3
hsa-miR-30b-5p	PAPD5	1	1	1	3
hsa-miR-30b-5p	DLL4	1	1	1	3
hsa-miR-30b-5p	LMBR1L	1	1	1	3
hsa-miR-18a-5p	DICER1	1	1	1	3
hsa-miR-30d-5p	LCOR	1	1	1	3
hsa-miR-181c-5p	TMF1	1	1	1	3
hsa-miR-181c-5p	SLC25A25	1	1	1	3
hsa-miR-192-5p	STX7	1	1	1	3
hsa-miR-155-5p	GNAS	1	1	1	3
hsa-miR-30b-5p	GFPT2	1	1	1	3
hsa-miR-30d-5p	OTUD4	1	1	1	3
hsa-miR-181c-5p	MAP3K3	1	1	1	3
hsa-miR-766-3p	PHF3	1	1	1	3
hsa-miR-192-5p	WDR44	1	1	1	3
hsa-miR-192-5p	NOD2	1	1	1	3
hsa-miR-30d-5p	ZFAND5	1	1	1	3
hsa-miR-224-3p	DYRK1A	1	1	1	3
hsa-miR-181c-5p	NAA50	1	1	1	3
hsa-miR-340-3p	TANGO2	1	1	1	3
hsa-miR-181c-5p	SCD	1	1	1	3
hsa-miR-181c-5p	DDX3X	1	1	1	3
hsa-miR-155-5p	MYO10	1	1	1	3
hsa-miR-155-5p	TAB2	1	1	1	3
hsa-miR-18a-5p	HMGCS1	1	1	1	3
hsa-miR-125a-3p	CFL2	1	1	1	3
hsa-miR-30d-5p	NRBP1	1	1	1	3
hsa-miR-181c-5p	RLF	1	1	1	3
hsa-miR-155-5p	MIDN	1	1	1	3
hsa-miR-132-3p	FXR1	1	1	1	3
hsa-miR-30d-5p	ATG5	1	1	1	3
hsa-miR-30b-5p	MAPK8	1	1	1	3
hsa-miR-181c-5p	ARF6	1	1	1	3
hsa-miR-155-5p	ZNF98	1	1	1	3
hsa-miR-181c-5p	PHC3	1	1	1	3
hsa-miR-7-5p	HELLS	1	1	1	3
hsa-miR-18a-5p	TAOK1	1	1	1	3
hsa-miR-125a-3p	RPL30	1	1	1	3
hsa-miR-30b-5p	TAF4B	1	1	1	3
hsa-miR-299-3p	PMP22	1	1	1	3
hsa-miR-155-5p	ZNF236	1	1	1	3
hsa-miR-18a-5p	DAAM2	1	1	1	3
hsa-miR-30d-5p	LHFPL2	1	1	1	3
hsa-miR-30b-5p	AFF4	1	1	1	3
hsa-miR-132-3p	TLN2	1	1	1	3
hsa-miR-155-5p	IRF2BP2	1	1	1	3
hsa-miR-18a-5p	PARD6B	1	1	1	3
hsa-miR-7-5p	EGFR	1	1	1	3
hsa-miR-155-5p	UBQLN1	1	1	1	3
hsa-miR-30b-5p	CSNK1G1	1	1	1	3
hsa-miR-181c-5p	PNRC2	1	1	1	3
hsa-miR-30b-5p	GNPDA1	1	1	1	3
hsa-miR-7-5p	DTYMK	1	1	1	3
hsa-miR-155-5p	DNAJB1	1	1	1	3
hsa-miR-155-5p	INTS6	1	1	1	3
hsa-miR-7-5p	CALM3	1	1	1	3
hsa-miR-30b-5p	LCOR	1	1	1	3
hsa-miR-30b-5p	CDCA7	1	1	1	3
hsa-miR-7-5p	EIF4E	1	1	1	3
hsa-miR-155-5p	SEPT11	1	1	1	3
hsa-miR-30b-5p	MZT1	1	1	1	3
hsa-miR-7-5p	TPGS2	1	1	1	3
hsa-miR-194-5p	FZD6	1	1	1	3
hsa-miR-30b-5p	ZFAND5	1	1	1	3
hsa-miR-7-5p	TMEM97	1	1	1	3
hsa-miR-30d-5p	POLR3E	1	1	1	3
hsa-miR-155-5p	CARHSP1	1	1	1	3
hsa-miR-7-5p	PTK2	1	1	1	3
hsa-miR-30d-5p	NFAT5	1	1	1	3
hsa-miR-7-5p	PDE4D	1	1	1	3
hsa-miR-30d-5p	CELSR3	1	1	1	3
hsa-miR-224-3p	MOB1B	1	1	1	3
hsa-miR-155-5p	VPS36	1	1	1	3
hsa-miR-132-3p	MAPK1	1	1	1	3
hsa-miR-30d-5p	MZT1	1	1	1	3
hsa-miR-181c-5p	TRIM2	1	1	1	3
hsa-miR-30b-5p	PLEKHO2	1	1	1	3
hsa-miR-155-5p	HNRNPA3	1	1	1	3
hsa-miR-181c-5p	HSP90B1	1	1	1	3
hsa-miR-181c-5p	SPIRE1	1	1	1	3
hsa-miR-214-5p	CCND1	1	1	1	3
hsa-miR-30b-5p	SIX1	1	1	1	3
hsa-miR-30b-5p	FRZB	1	1	1	3
hsa-miR-340-3p	LRTOMT	1	1	1	3
hsa-miR-7-5p	ARF4	1	1	1	3
hsa-miR-125a-3p	SGK1	1	1	1	3
hsa-miR-132-3p	MEF2A	1	1	1	3
hsa-miR-7-5p	ZBTB22	1	1	1	3
hsa-miR-192-5p	RABGAP1	1	1	1	3
hsa-miR-30d-5p	GLCE	1	1	1	3
hsa-miR-30d-5p	SOCS3	1	1	1	3
hsa-miR-7-5p	POLE4	1	1	1	3
hsa-miR-132-3p	CRK	1	1	1	3
hsa-miR-30b-5p	ZNRF1	1	1	1	3
hsa-miR-181c-5p	ARSJ	1	1	1	3
hsa-miR-18a-5p	TMEM2	1	1	1	3
hsa-miR-30d-5p	CSNK1G1	1	1	1	3
hsa-miR-7-5p	PARP1	1	1	1	3
hsa-miR-192-5p	FAM199X	1	1	1	3

## Sheet: GO enrichment analysis 
GO enrichment analysis
ID	Description	pvalue	geneID
GO:0042974	retinoic acid receptor binding	0.000172659	ASXL1/FUS
GO:0003073	regulation of systemic arterial blood pressure	0.00186172	PDE4D/DDAH1
GO:0030183	B cell differentiation	0.00341591	IRF2BP2/KLF6
GO:0014065	phosphatidylinositol 3-kinase signaling	0.00504624	PIP4K2A/IGF1R
GO:0001501	skeletal system development	0.0055515	TRPS1/PIP4K2A/ASXL1
GO:0035257	nuclear hormone receptor binding	0.00633518	ASXL1/FUS
GO:0048015	phosphatidylinositol-mediated signaling	0.00672397	PIP4K2A/IGF1R
GO:0048017	inositol lipid-mediated signaling	0.00696997	PIP4K2A/IGF1R
GO:0008217	regulation of blood pressure	0.00747417	PDE4D/DDAH1
GO:0006527	arginine catabolic process	0.00779007	DDAH1
GO:0031994	insulin-like growth factor I binding	0.00822195	IGF1R
GO:0042975	peroxisome proliferator activated receptor binding	0.00822195	ASXL1
GO:0043560	insulin receptor substrate binding	0.00822195	IGF1R
GO:0051427	hormone receptor binding	0.00838929	ASXL1/FUS
GO:0086023	adenylate cyclase-activating adrenergic receptor signaling pathway involved in heart process	0.00856597	PDE4D
GO:1901077	regulation of relaxation of muscle	0.00856597	PDE4D
GO:2000786	positive regulation of autophagosome assembly	0.00856597	PIP4K2A
GO:0005172	vascular endothelial growth factor receptor binding	0.00904068	PDCL3
GO:0060348	bone development	0.00927078	PIP4K2A/ASXL1
GO:0010649	regulation of cell communication by electrical coupling	0.00934131	PDE4D
GO:0042575	DNA polymerase complex	0.00970349	POLE4
GO:0016307	phosphatidylinositol phosphate kinase activity	0.00985879	PIP4K2A
GO:0032754	positive regulation of interleukin-5 production	0.0101161	PDE4D
GO:0043116	negative regulation of vascular permeability	0.0101161	DDAH1
GO:0044090	positive regulation of vacuole organization	0.0101161	PIP4K2A
GO:0071872	cellular response to epinephrine stimulus	0.0101161	PDE4D
GO:0045766	positive regulation of angiogenesis	0.0106325	DDAH1/PDCL3
GO:0006525	arginine metabolic process	0.0108903	DDAH1
GO:0009214	cyclic nucleotide catabolic process	0.0108903	PDE4D
GO:0035358	regulation of peroxisome proliferator activated receptor signaling pathway	0.0108903	ASXL1
GO:0005671	Ada2/Gcn5/Ada3 transcription activator complex	0.0111885	POLE4
GO:0044183	protein binding involved in protein folding	0.0114931	PDCL3
GO:1900037	regulation of cellular response to hypoxia	0.0116639	DDAH1
GO:0042113	B cell activation	0.0118664	IRF2BP2/KLF6
GO:0046965	retinoid X receptor binding	0.0123093	FUS
GO:0048385	regulation of retinoic acid receptor signaling pathway	0.012437	ASXL1
GO:0055119	relaxation of cardiac muscle	0.012437	PDE4D
GO:0071871	response to epinephrine	0.012437	PDE4D
GO:0071880	adenylate cyclase-activating adrenergic receptor signaling pathway	0.012437	PDE4D
GO:0086103	G protein-coupled receptor signaling pathway involved in heart process	0.012437	PDE4D
GO:0035855	megakaryocyte development	0.0132096	PIP4K2A
GO:1904018	positive regulation of vasculature development	0.0137177	DDAH1/PDCL3
GO:0031489	myosin V binding	0.0139399	FUS
GO:0031690	adrenergic receptor binding	0.0139399	PDE4D
GO:0038083	peptidyl-tyrosine autophosphorylation	0.0139815	IGF1R
GO:0035357	peroxisome proliferator activated receptor signaling pathway	0.0155238	ASXL1
GO:0097062	dendritic spine maintenance	0.0155238	IGF1R
GO:0032674	regulation of interleukin-5 production	0.016294	PDE4D
GO:0046058	cAMP metabolic process	0.016294	PDE4D
GO:0005158	insulin receptor binding	0.0163811	IGF1R
GO:0030552	cAMP binding	0.0163811	PDE4D
GO:0032634	interleukin-5 production	0.0170638	PDE4D
GO:0071875	adrenergic receptor signaling pathway	0.0170638	PDE4D
GO:0003887	DNA-directed DNA polymerase activity	0.0171936	POLE4
GO:0007413	axonal fasciculation	0.0178329	CELSR3
GO:0016578	histone deubiquitination	0.0178329	ASXL1
GO:0106030	neuron projection fasciculation	0.0178329	CELSR3
GO:0004112	cyclic-nucleotide phosphodiesterase activity	0.0180054	PDE4D
GO:0004114	3',5'-cyclic-nucleotide phosphodiesterase activity	0.0180054	PDE4D
GO:0043951	negative regulation of cAMP-mediated signaling	0.0186015	PDE4D
GO:0086064	cell communication by electrical coupling involved in cardiac conduction	0.0186015	PDE4D
GO:0009065	glutamine family amino acid catabolic process	0.0193696	DDAH1
GO:0010460	positive regulation of heart rate	0.0193696	PDE4D
GO:0060314	regulation of ryanodine-sensitive calcium-release channel activity	0.0193696	PDE4D
GO:0007263	nitric oxide mediated signal transduction	0.0201371	DDAH1
GO:0009154	purine ribonucleotide catabolic process	0.0201371	PDE4D
GO:0009261	ribonucleotide catabolic process	0.020904	PDE4D
GO:0032201	telomere maintenance via semi-conservative replication	0.020904	POLE4
GO:0033137	negative regulation of peptidyl-serine phosphorylation	0.020904	PDE4D
GO:0046854	phosphatidylinositol phosphorylation	0.020904	PIP4K2A
GO:0005520	insulin-like growth factor binding	0.0212466	IGF1R
GO:0035255	ionotropic glutamate receptor binding	0.0212466	FUS
GO:0048384	retinoic acid receptor signaling pathway	0.0216704	ASXL1
GO:0046966	thyroid hormone receptor binding	0.0220554	FUS
GO:0003713	transcription coactivator activity	0.0223916	ASXL1/FUS
GO:0010644	cell communication by electrical coupling	0.0224362	PDE4D
GO:0045822	negative regulation of heart contraction	0.0224362	PDE4D
GO:0043548	phosphatidylinositol 3-kinase binding	0.0228635	IGF1R
GO:0006270	DNA replication initiation	0.0232014	POLE4
GO:0032743	positive regulation of interleukin-2 production	0.0232014	PDE4D
GO:0090075	relaxation of muscle	0.0232014	PDE4D
GO:2000781	positive regulation of double-strand break repair	0.0232014	FUS
GO:0010880	regulation of release of sequestered calcium ion into cytosol by sarcoplasmic reticulum	0.0239662	PDE4D
GO:1902562	H4 histone acetyltransferase complex	0.0244613	POLE4
GO:0097242	amyloid-beta clearance	0.0254939	IGF1R
GO:0098751	bone cell development	0.0254939	PIP4K2A
GO:2000785	regulation of autophagosome assembly	0.0254939	PIP4K2A
GO:0030098	lymphocyte differentiation	0.0258609	IRF2BP2/KLF6
GO:0030551	cyclic nucleotide binding	0.0260898	PDE4D
GO:0034061	DNA polymerase activity	0.0260898	POLE4
GO:0045777	positive regulation of blood pressure	0.0262569	PDE4D
GO:0071868	cellular response to monoamine stimulus	0.0262569	PDE4D
GO:0071870	cellular response to catecholamine stimulus	0.0262569	PDE4D
GO:0014808	release of sequestered calcium ion into cytosol by sarcoplasmic reticulum	0.0270194	PDE4D
GO:0005891	voltage-gated calcium channel complex	0.0273883	PDE4D
GO:0008038	neuron recognition	0.0277813	CELSR3
GO:0009187	cyclic nucleotide metabolic process	0.0277813	PDE4D
GO:0043114	regulation of vascular permeability	0.0277813	DDAH1
GO:0043243	positive regulation of protein complex disassembly	0.0277813	IGF1R
GO:0045911	positive regulation of DNA recombination	0.0277813	FUS
GO:0048009	insulin-like growth factor receptor signaling pathway	0.0277813	IGF1R
GO:1903514	release of sequestered calcium ion into cytosol by endoplasmic reticulum	0.0277813	PDE4D
GO:0018108	peptidyl-tyrosine phosphorylation	0.0290441	IGF1R/PDCL3
GO:0044088	regulation of vacuole organization	0.0293035	PIP4K2A
GO:0071867	response to monoamine	0.0293035	PDE4D
GO:0071869	response to catecholamine	0.0293035	PDE4D
GO:1903523	negative regulation of blood circulation	0.0293035	PDE4D
GO:0018212	peptidyl-tyrosine modification	0.0295113	IGF1R/PDCL3
GO:0006195	purine nucleotide catabolic process	0.0300638	PDE4D
GO:0045823	positive regulation of heart contraction	0.0300638	PDE4D
GO:0046834	lipid phosphorylation	0.0300638	PIP4K2A
GO:0048286	lung alveolus development	0.0308235	ASXL1
GO:0061028	establishment of endothelial barrier	0.0308235	PDE4D
GO:0017046	peptide hormone binding	0.0309107	IGF1R
GO:0035254	glutamate receptor binding	0.0309107	FUS
GO:0031519	PcG protein complex	0.0310355	ASXL1
GO:0019932	second-messenger-mediated signaling	0.0312506	PDE4D/DDAH1
GO:0010569	regulation of double-strand break repair via homologous recombination	0.0315827	FUS
GO:0070296	sarcoplasmic reticulum calcium ion transport	0.0315827	PDE4D
GO:0045429	positive regulation of nitric oxide biosynthetic process	0.0323413	DDAH1
GO:0086004	regulation of cardiac muscle cell contraction	0.0323413	PDE4D
GO:0003044	regulation of systemic arterial blood pressure mediated by a chemical signal	0.0330993	PDE4D
GO:1904407	positive regulation of nitric oxide metabolic process	0.0330993	DDAH1
GO:1904646	cellular response to amyloid-beta	0.0330993	IGF1R
GO:0030331	estrogen receptor binding	0.0333128	FUS
GO:0072523	purine-containing compound catabolic process	0.0338568	PDE4D
GO:0045765	regulation of angiogenesis	0.0350177	DDAH1/PDCL3
GO:0032330	regulation of chondrocyte differentiation	0.0353702	TRPS1
GO:0048538	thymus development	0.0353702	ASXL1
GO:0033260	nuclear DNA replication	0.036126	POLE4
GO:1903115	regulation of actin filament-based movement	0.036126	PDE4D
GO:2000059	negative regulation of ubiquitin-dependent protein catabolic process	0.036126	PDCL3
GO:0043949	regulation of cAMP-mediated signaling	0.0376361	PDE4D
GO:0045599	negative regulation of fat cell differentiation	0.039144	ASXL1
GO:0050999	regulation of nitric-oxide synthase activity	0.039144	DDAH1
GO:0004714	transmembrane receptor protein tyrosine kinase activity	0.0396915	IGF1R
GO:0043954	cellular component maintenance	0.0398971	IGF1R
GO:0090307	mitotic spindle assembly	0.0398971	MYBL2
GO:0001228	DNA-binding transcription activator activity, RNA polymerase II-specific	0.0399534	KLF6/MYBL2
GO:0001933	negative regulation of protein phosphorylation	0.0407199	PDE4D/IGF1R
GO:0032663	regulation of interleukin-2 production	0.0414016	PDE4D
GO:1904645	response to amyloid-beta	0.0414016	IGF1R
GO:0016570	histone modification	0.0414341	ASXL1/POLE4
GO:0001885	endothelial cell development	0.0421531	PDE4D
GO:1901342	regulation of vasculature development	0.0423336	DDAH1/PDCL3
GO:0086065	cell communication involved in cardiac conduction	0.042904	PDE4D
GO:0034704	calcium channel complex	0.0433413	PDE4D
GO:0043525	positive regulation of neuron apoptotic process	0.0436544	MYBL2
GO:0044786	cell cycle DNA replication	0.0436544	POLE4
GO:1903428	positive regulation of reactive oxygen species biosynthetic process	0.0436544	DDAH1
GO:0098797	plasma membrane protein complex	0.0437049	PDE4D/IGF1R
GO:0016569	covalent chromatin modification	0.0437886	ASXL1/POLE4
GO:0005844	polysome	0.0440606	FUS
GO:0043966	histone H3 acetylation	0.0444042	POLE4
GO:0030593	neutrophil chemotaxis	0.0459022	PDE4D
GO:0097110	scaffold protein binding	0.0468208	PDE4D
GO:0044454	nuclear chromosome part	0.0469067	TRPS1/POLE4
GO:0032623	interleukin-2 production	0.047398	PDE4D
GO:0032729	positive regulation of interferon-gamma production	0.047398	PDE4D
GO:0045739	positive regulation of DNA repair	0.047398	FUS
GO:0042326	negative regulation of phosphorylation	0.0478873	PDE4D/IGF1R
GO:0000978	RNA polymerase II proximal promoter sequence-specific DNA binding	0.0480796	KLF6/MYBL2
GO:0071277	cellular response to calcium ion	0.0481451	FUS
GO:0017022	myosin binding	0.0483984	FUS
GO:0032768	regulation of monooxygenase activity	0.0488917	DDAH1
GO:0045428	regulation of nitric oxide biosynthetic process	0.0496377	DDAH1

## Sheet: KEGG enrichment analysis
KEGG pathway enrichment analysis
ID	Description	pvalue	geneID
hsa05202	Transcriptional misregulation in cancer	0.0076838	IGF1R/FUS
hsa03410	Base excision repair	0.0246686	POLE4
hsa03030	DNA replication	0.0268858	POLE4
hsa03420	Nucleotide excision repair	0.0349797	POLE4
hsa04913	Ovarian steroidogenesis	0.0364453	IGF1R
hsa04730	Long-term depression	0.0444729	IGF1R
hsa04213	Longevity regulating pathway - multiple species	0.0459264	IGF1R
